# Supplementary material for: CDK4/6 inhibition mitigates stem cell damage in a novel model for taxane‐induced alopecia
Source: PubMed Central journal article supplement (PMC6783643; doi:10.15252/emmm.201911031), 2019-09-12

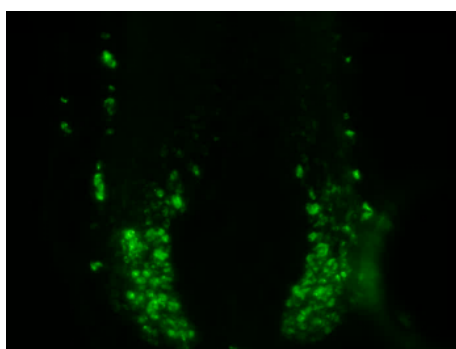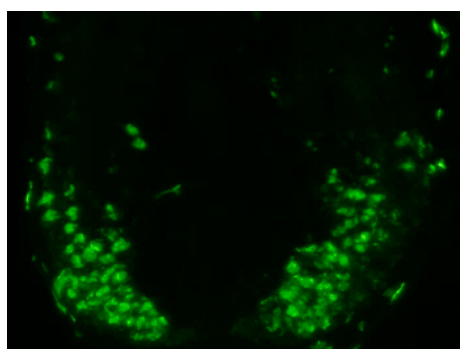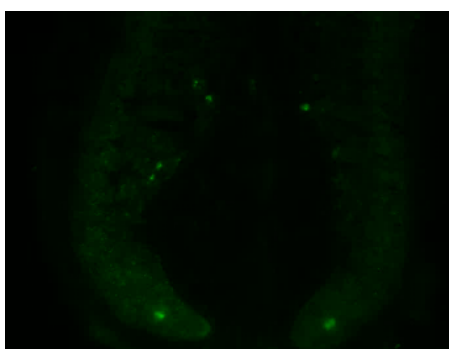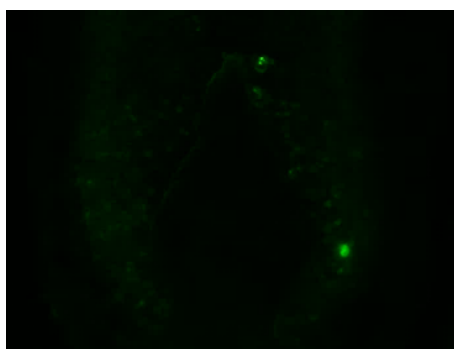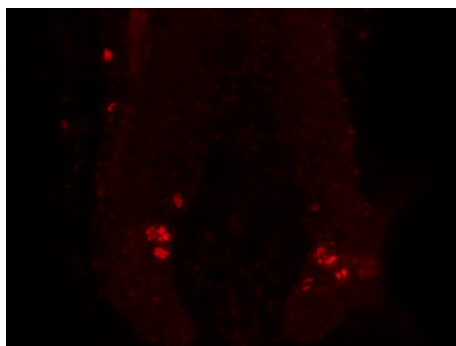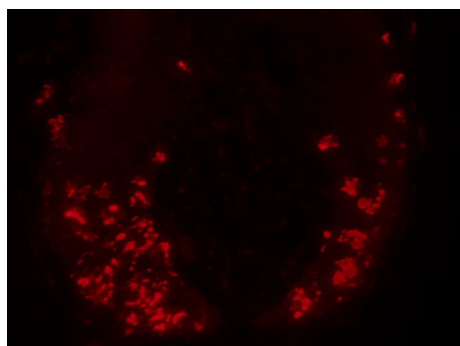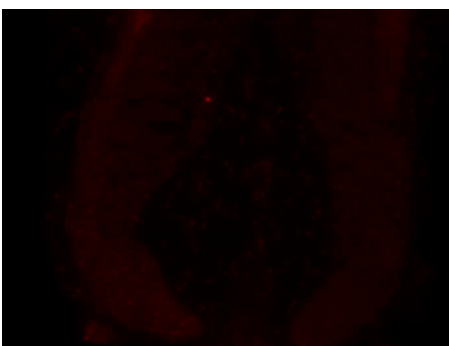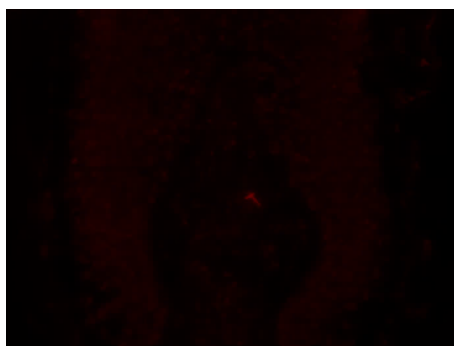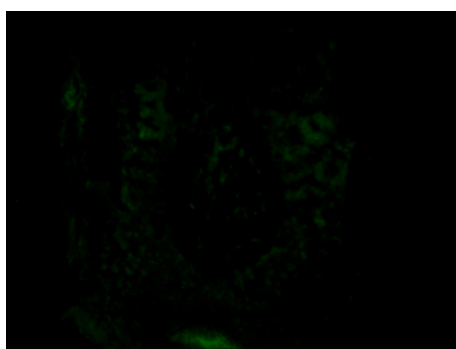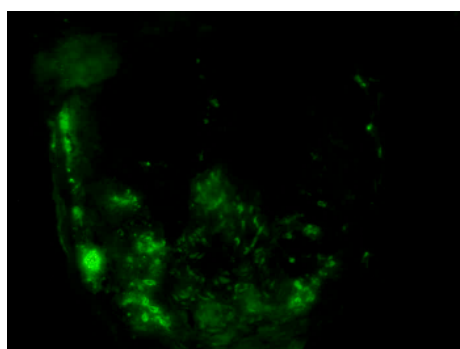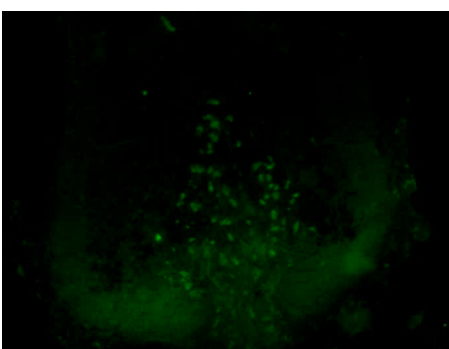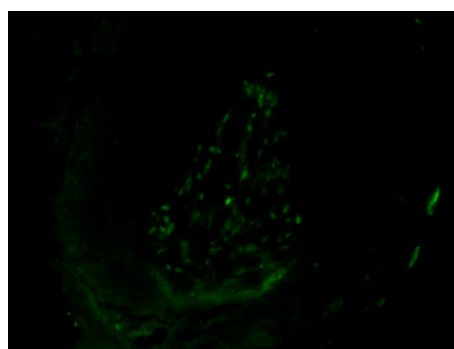

Supplement: EMMM-11-e11031-s006.pdf [file EMMM-11-e11031-s006.pdf]
